# Supplementary material for: DREB Genes from Common Bean (Phaseolus vulgaris L.) Show Broad to Specific Abiotic Stress Responses and Distinct Levels of Nucleotide Diversity
Source: PubMed Central journal article supplement (PMC6525893; doi:10.1155/2019/9520642), 2019-05-02

A-1

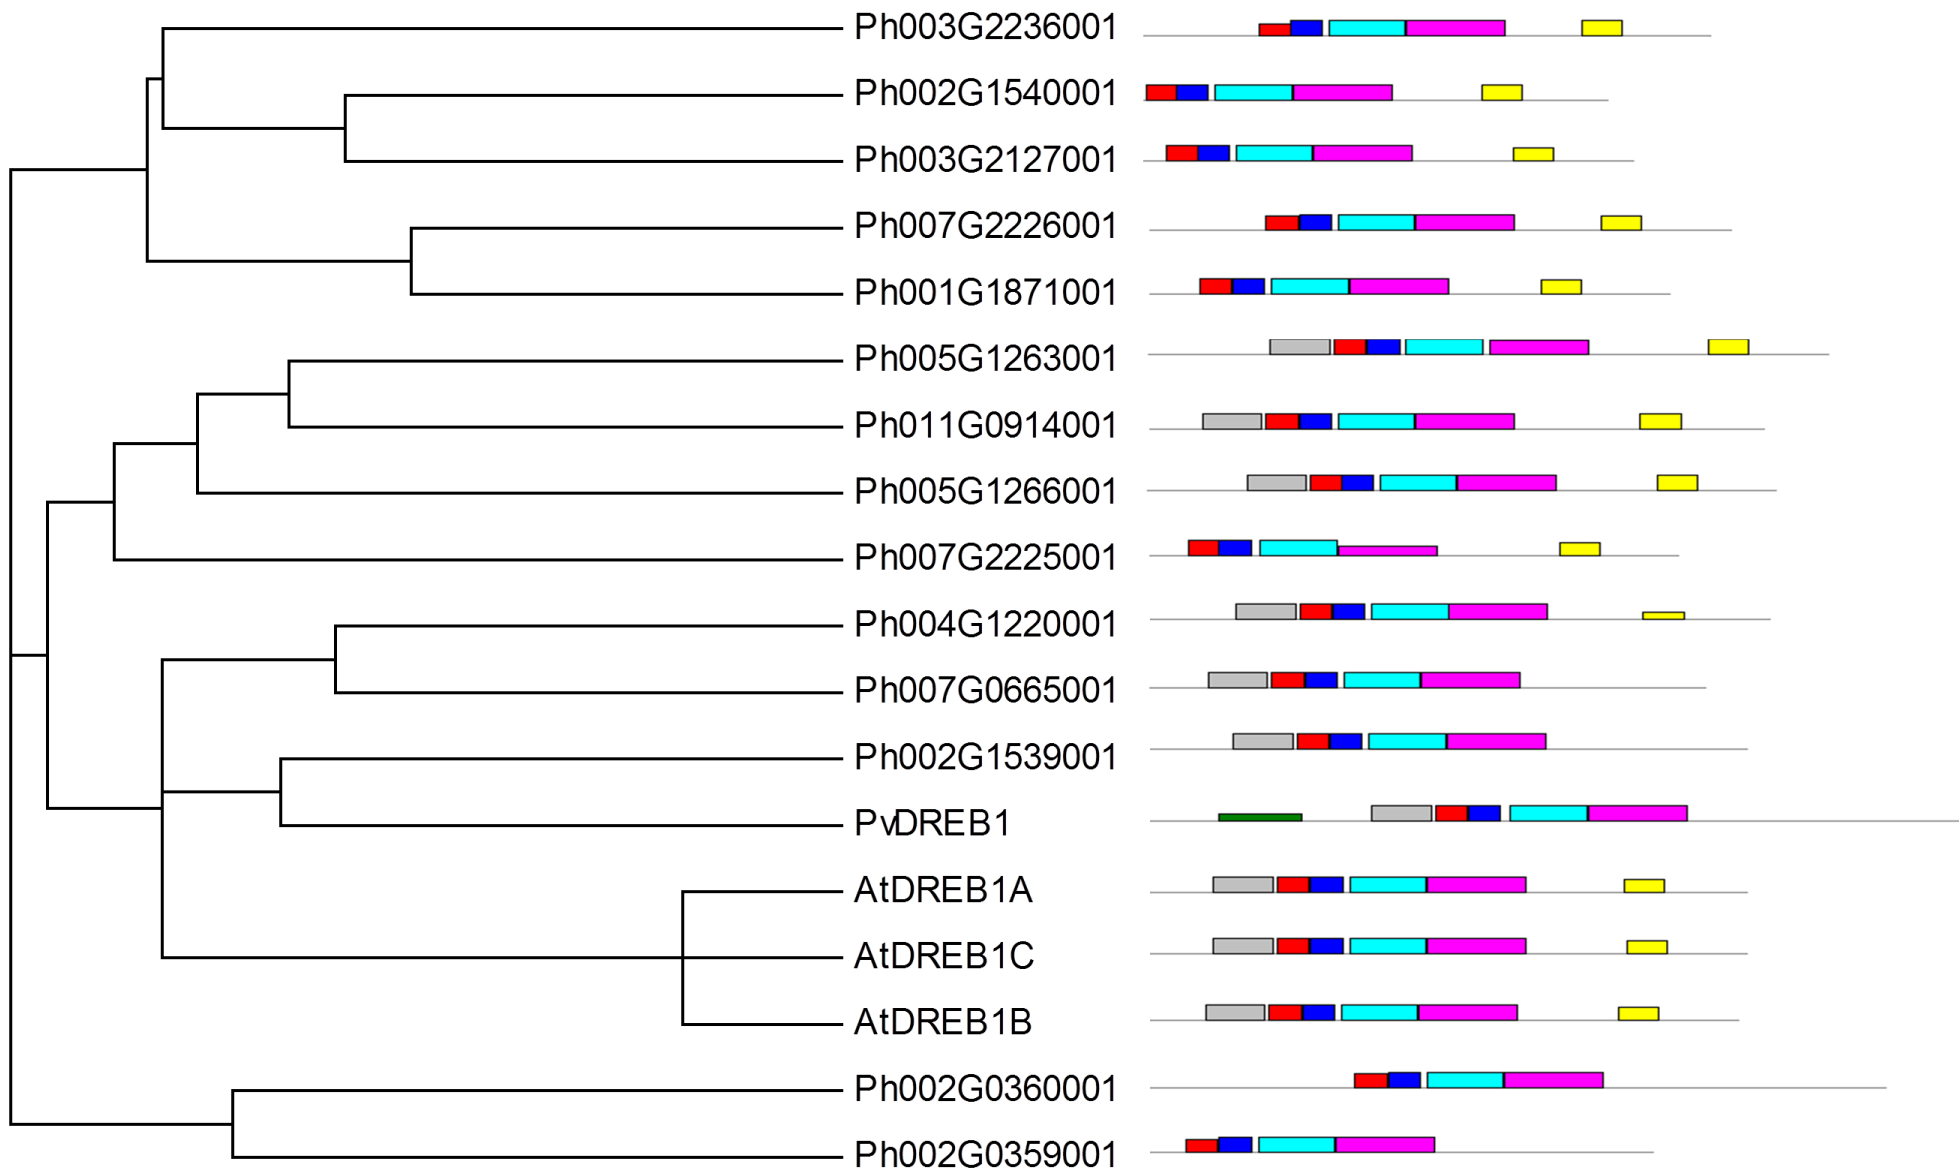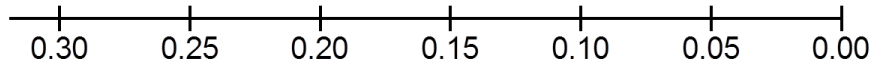

A-2

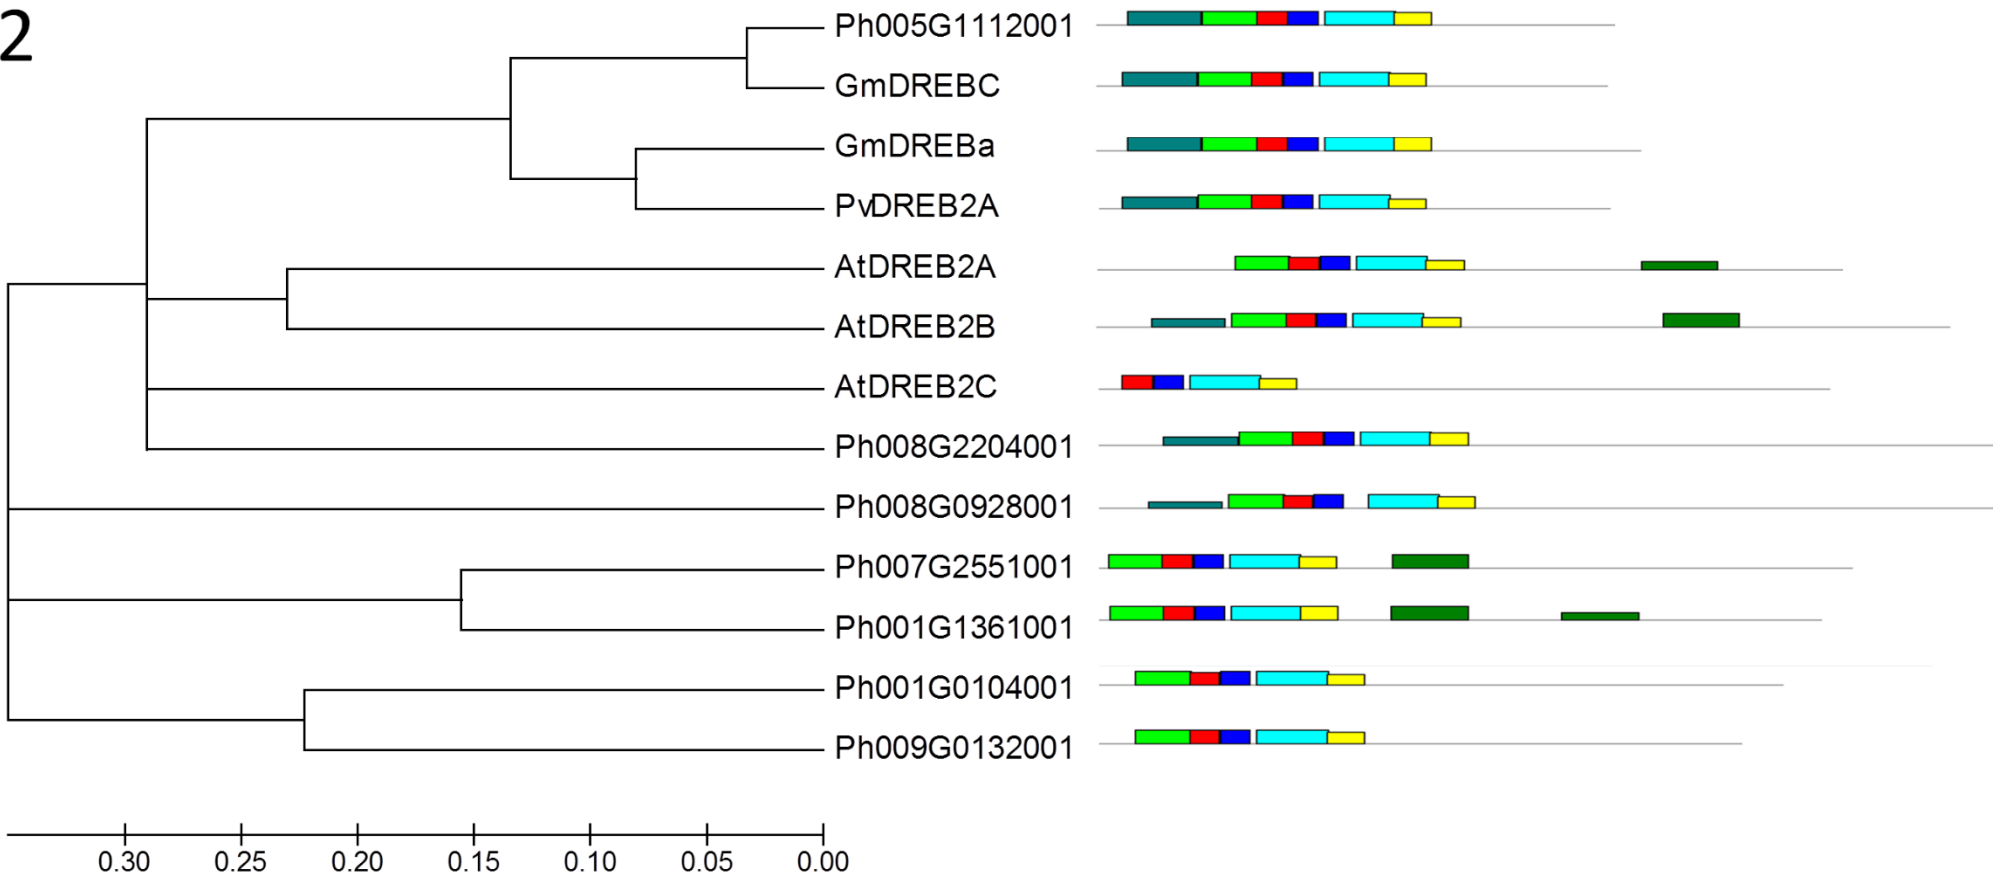

A-3

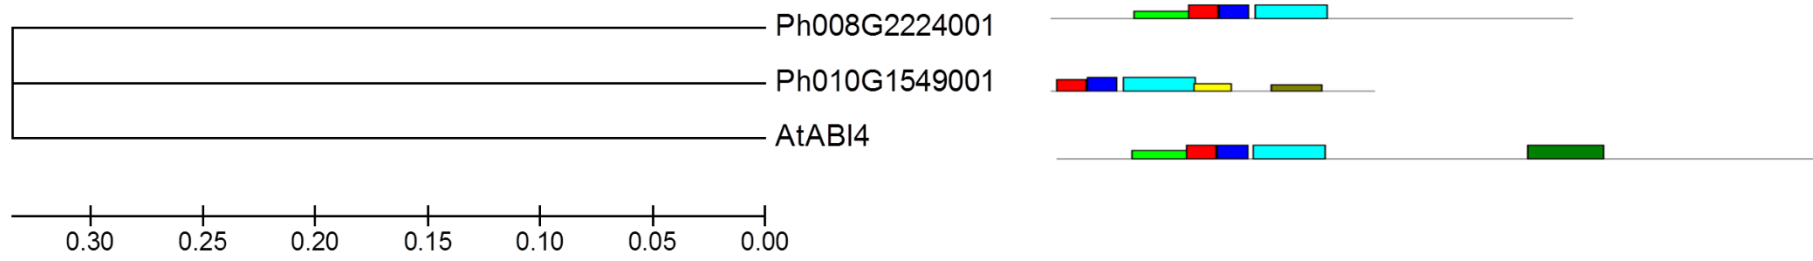

A-4

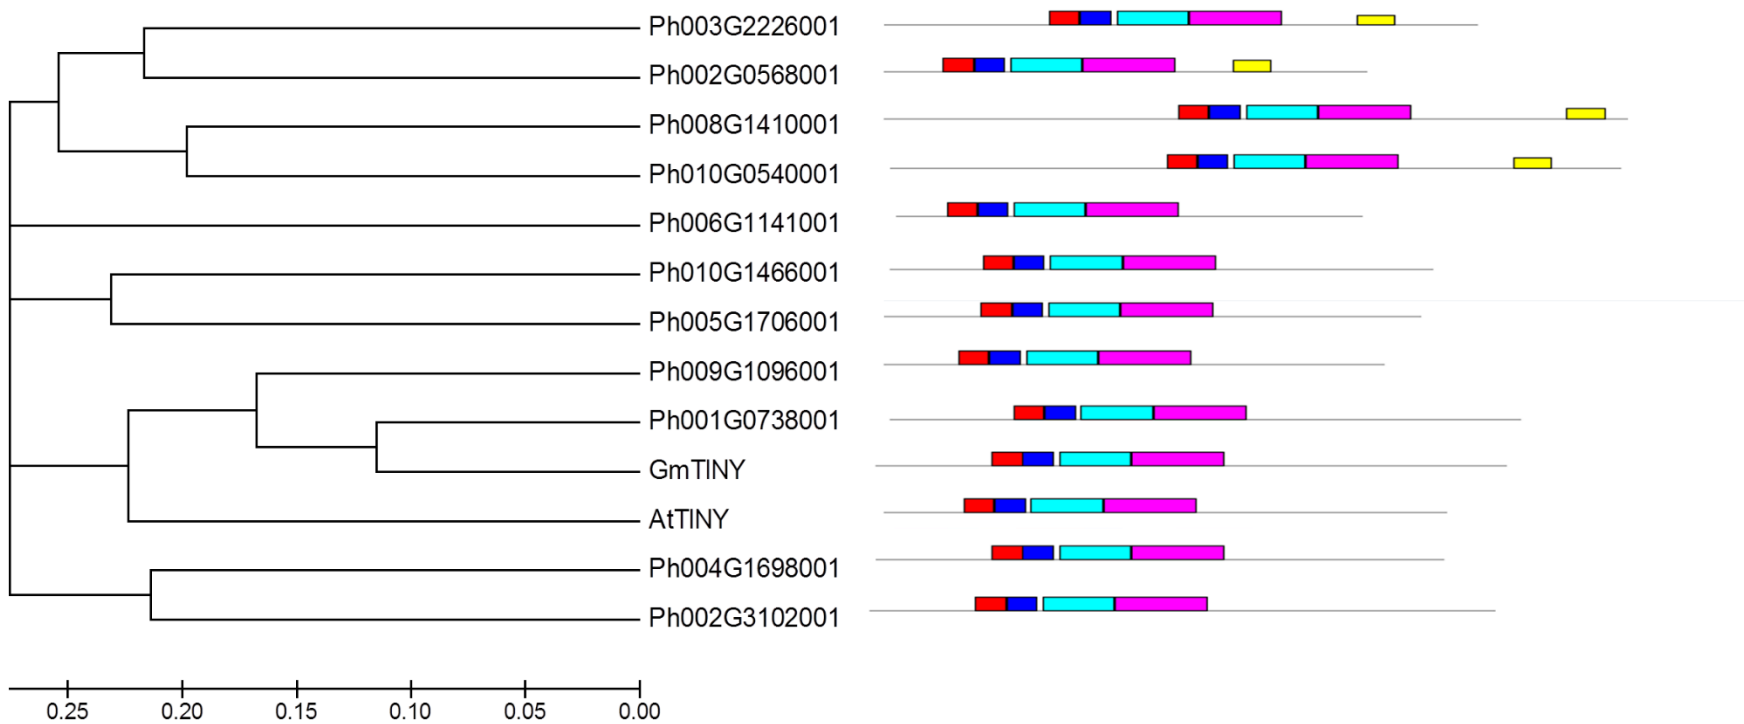

A-5

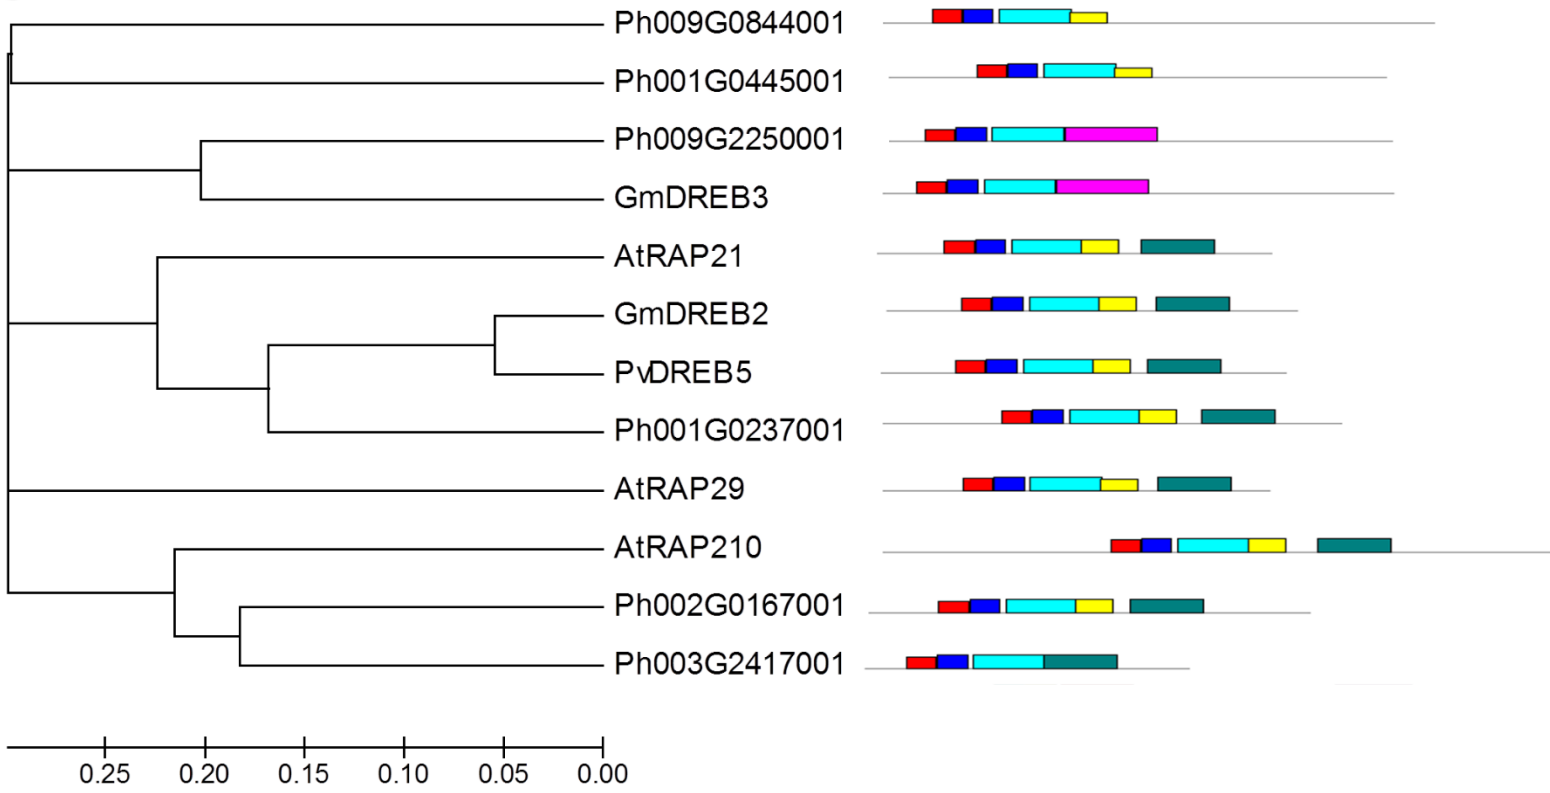

A-6

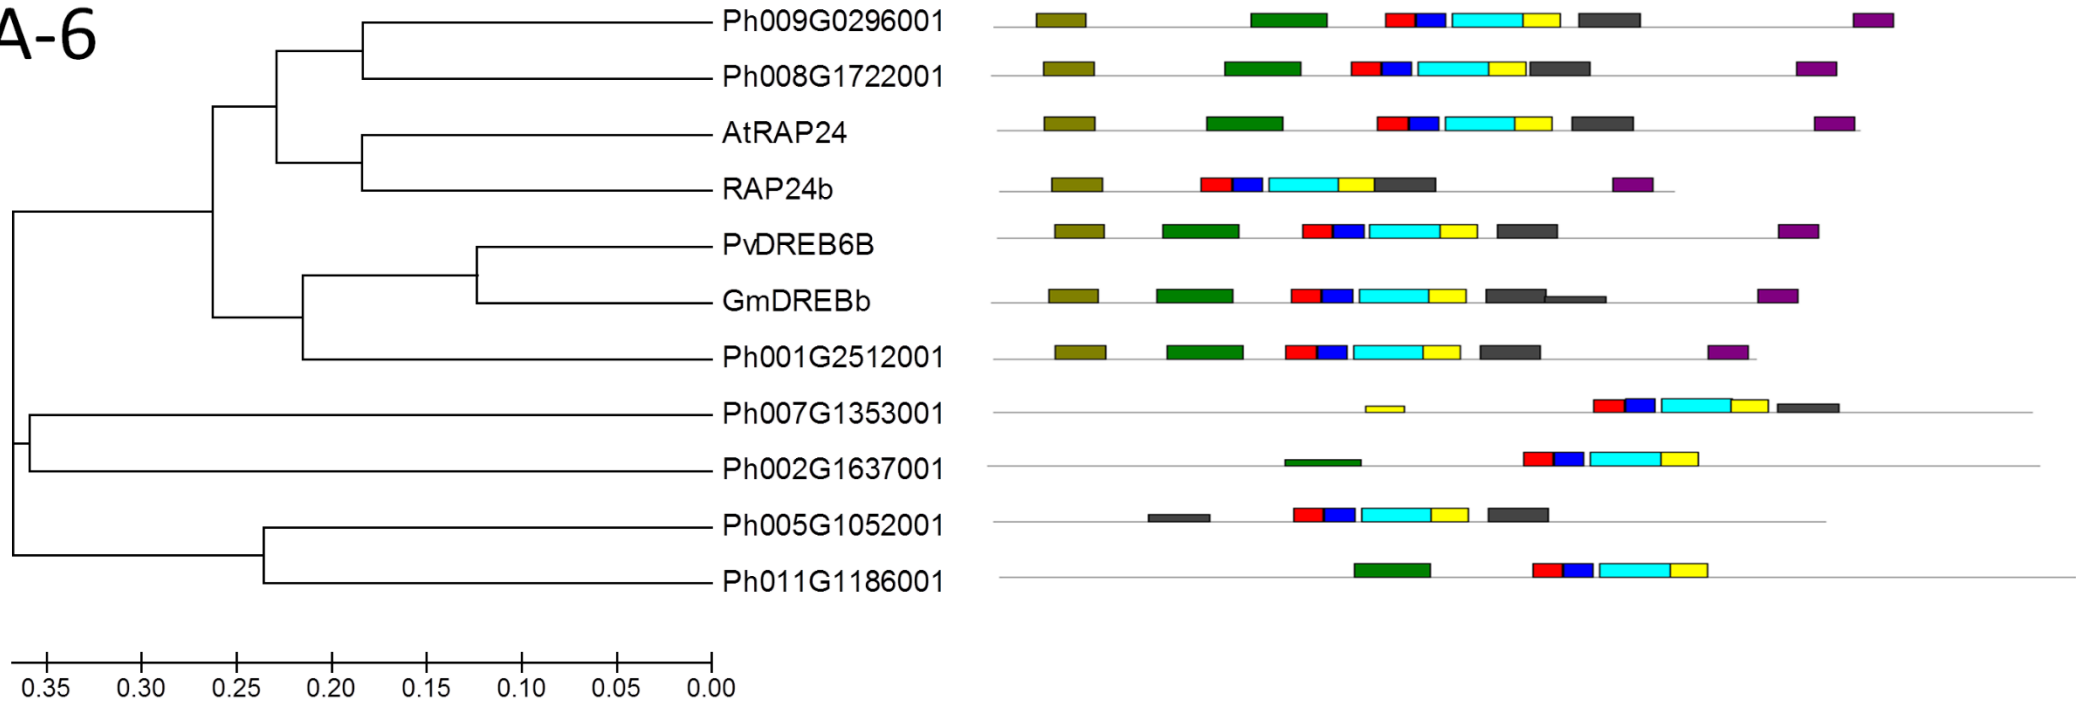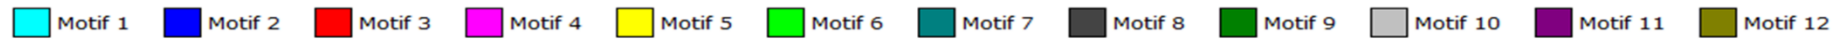

Supplement: 9520642.f13.pdf [file 9520642.f13.pdf]
