# Supplementary material for: DREBGenes from Common Bean (Phaseolus vulgarisL.) Show Broad to Specific Abiotic Stress Responses and Distinct Levels of Nucleotide Diversity
Source: Hindawi journal article supplement (doi:10.1155/2019/9520642), 2019-05-02
Supplement: f2 [file 9520642.f2.pdf]

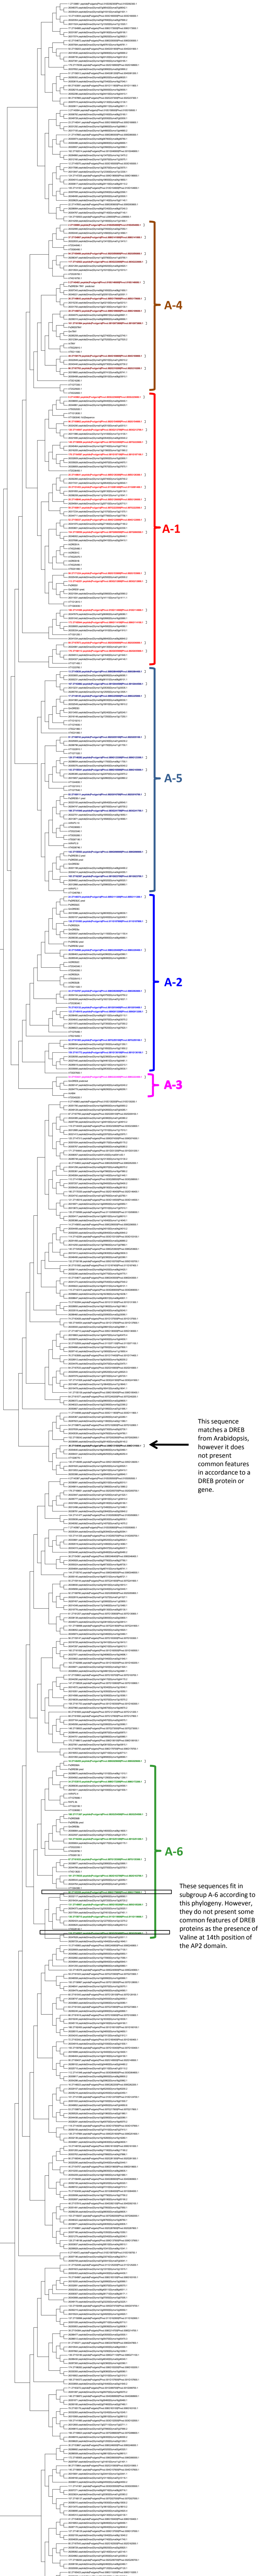

A-4

A-1

A-5

A-2

A-3

A-6

This sequence matches a DREB from Arabidopsis, however it does not present common features in accordance to a DREB protein or a gene.

These sequences fit in subgroup A-6 according to their phylogeny. However, they do not present some common features of DREB proteins as the presence of Valine at 14th position of the AP2 domain.
