# Supplementary material for: DREBGenes from Common Bean (Phaseolus vulgarisL.) Show Broad to Specific Abiotic Stress Responses and Distinct Levels of Nucleotide Diversity
Source: Hindawi journal article supplement (doi:10.1155/2019/9520642), 2019-05-02

A

## RWC

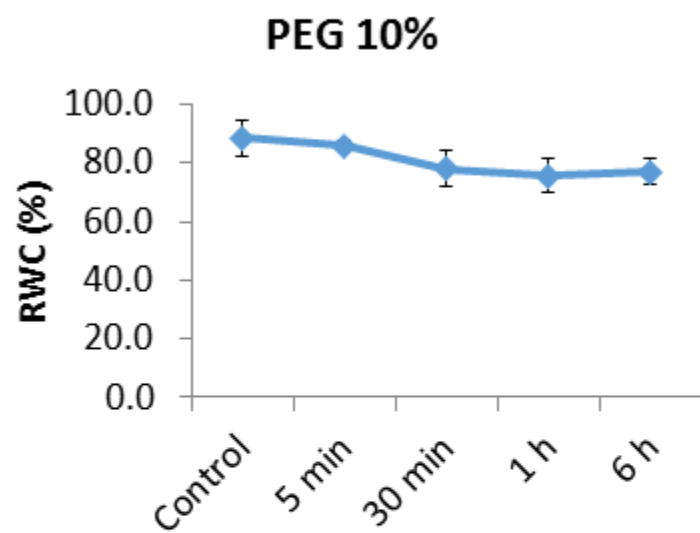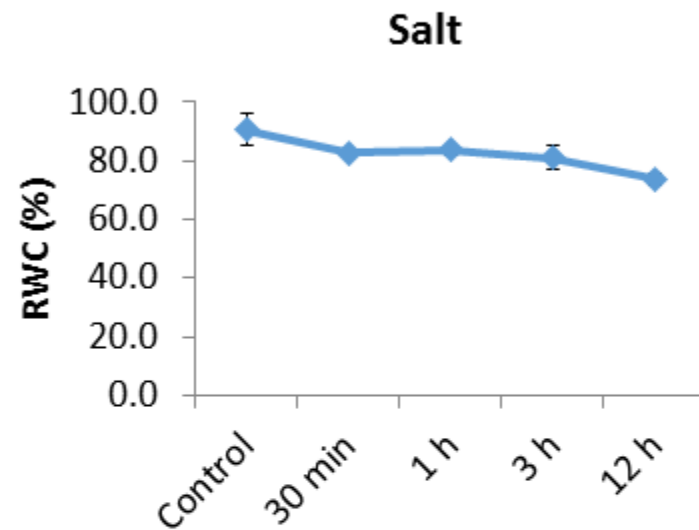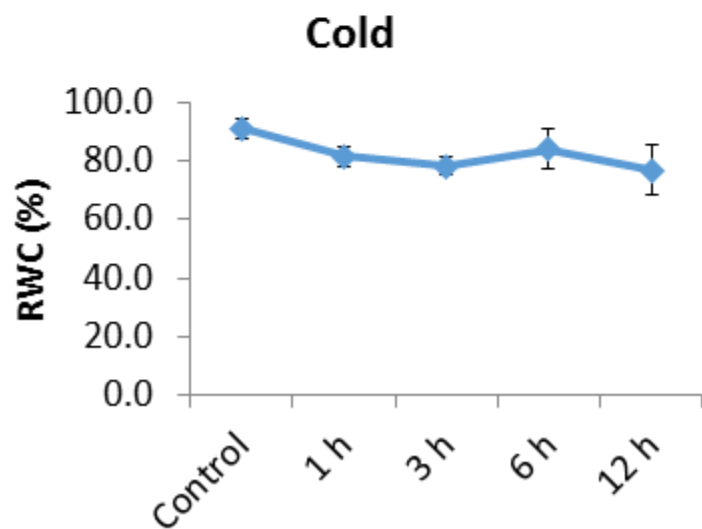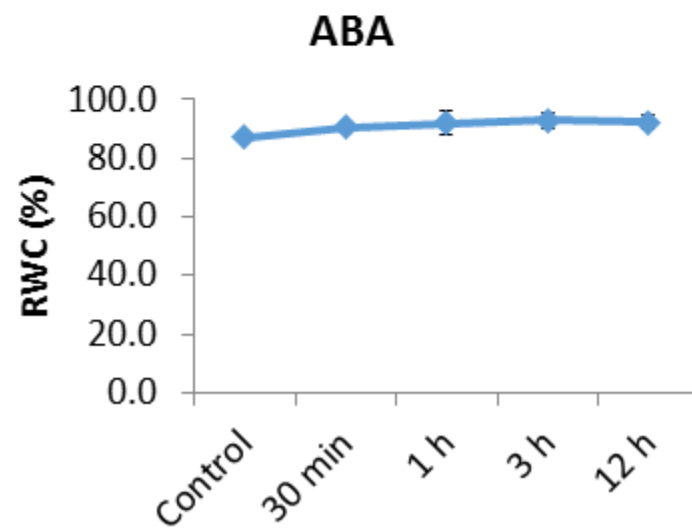

**B**

# CATALASE ACTIVITY

**PEG 10%**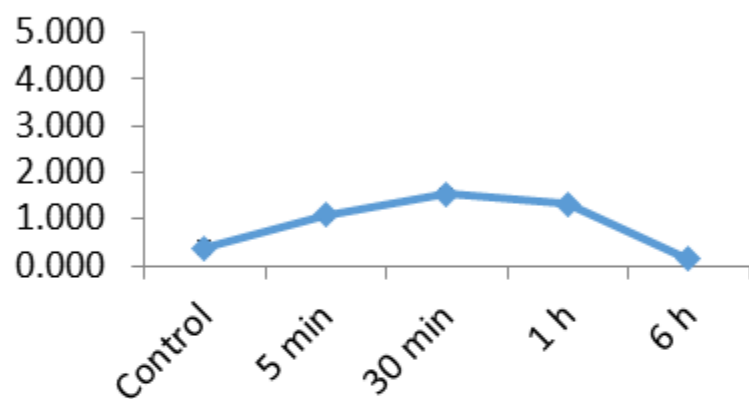**Salt**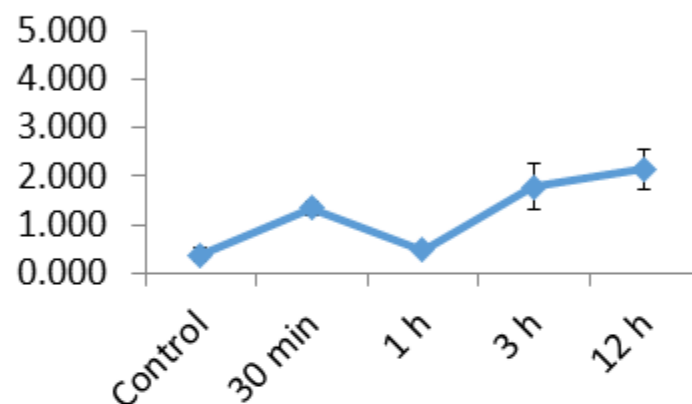**Cold**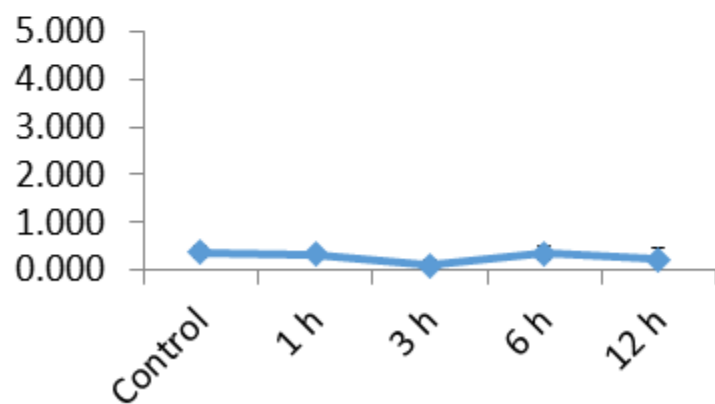**ABA**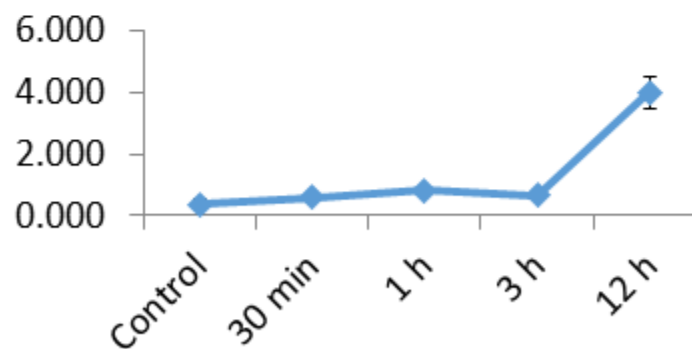

Supplement: f11 [file 9520642.f11.pdf]
