# Supplementary material for: DREBGenes from Common Bean (Phaseolus vulgarisL.) Show Broad to Specific Abiotic Stress Responses and Distinct Levels of Nucleotide Diversity
Source: Hindawi journal article supplement (doi:10.1155/2019/9520642), 2019-05-02

**A**

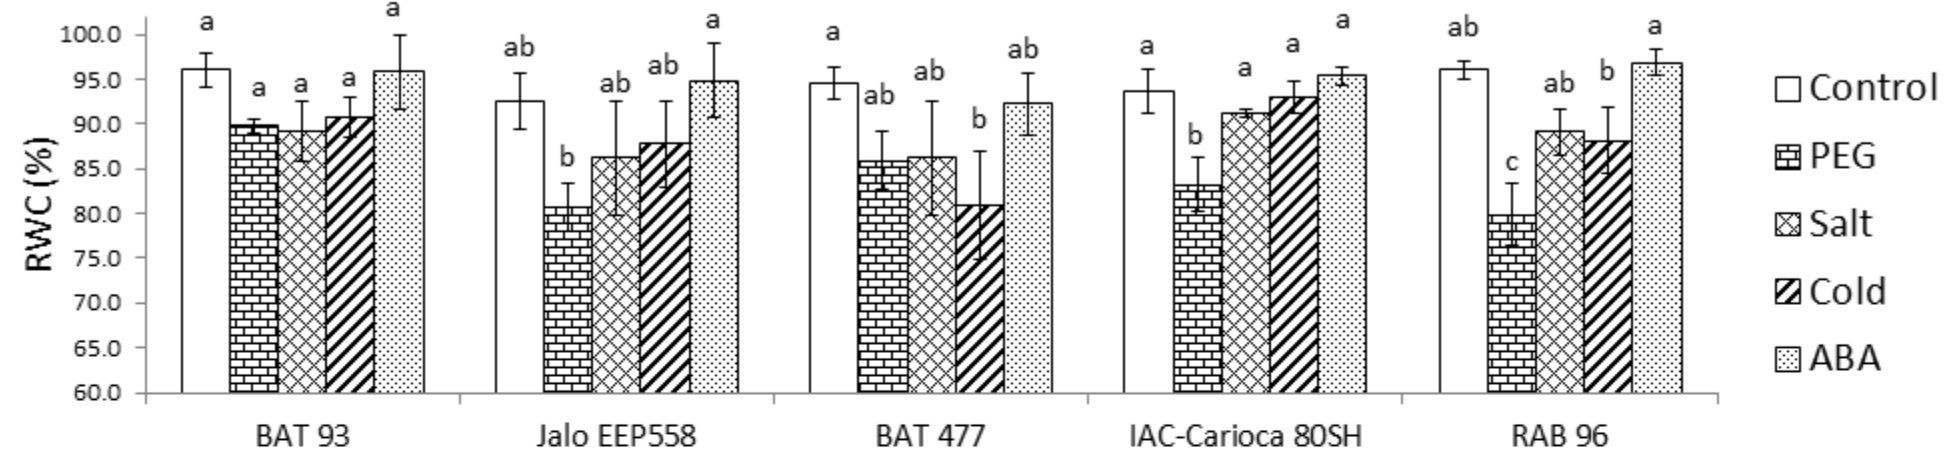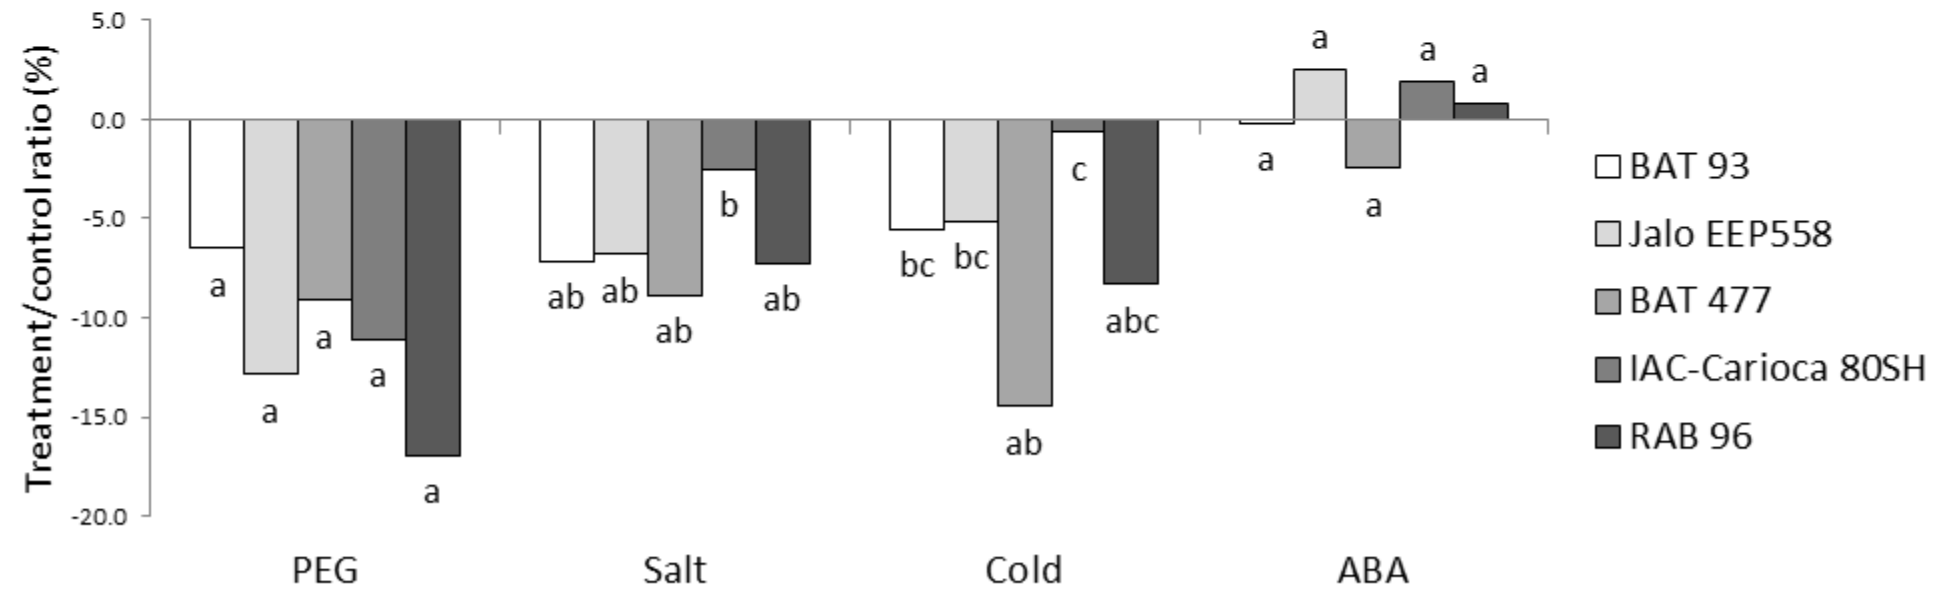

**B**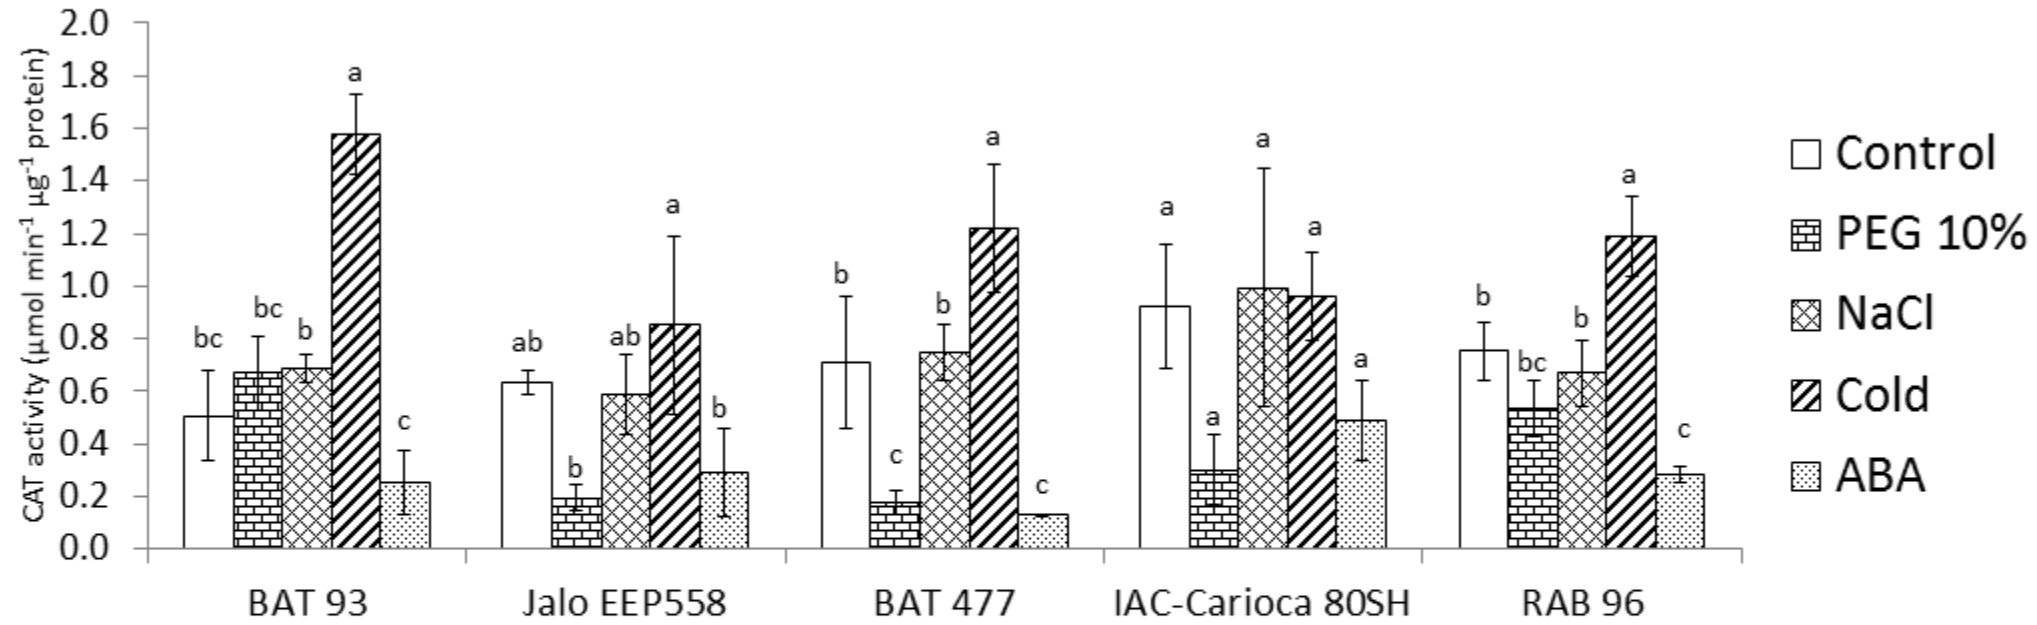

Supplement: f12 [file 9520642.f12.pdf]
