# Supplementary material for: DREBGenes from Common Bean (Phaseolus vulgarisL.) Show Broad to Specific Abiotic Stress Responses and Distinct Levels of Nucleotide Diversity
Source: Hindawi journal article supplement (doi:10.1155/2019/9520642), 2019-05-02

**A**

cDNA of leaf control sample (no stress)

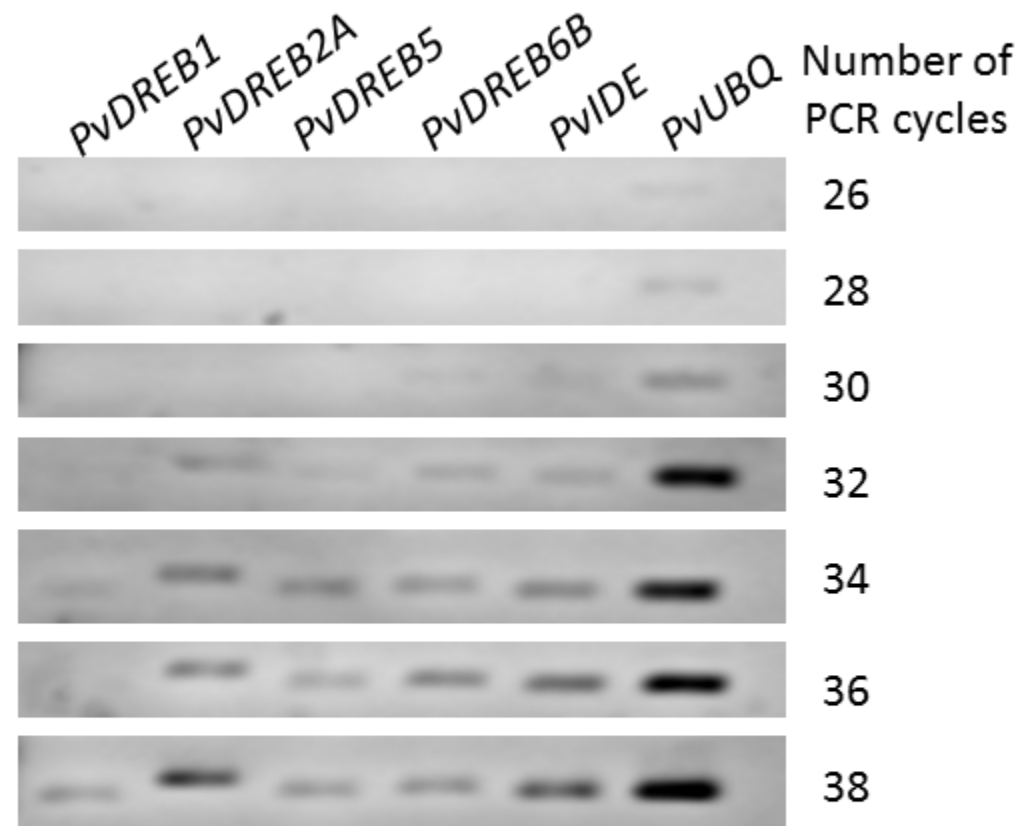

Supplement: f14 [file 9520642.f14.pdf]
