# Supplementary material for: DREB Genes from Common Bean (Phaseolus vulgaris L.) Show Broad to Specific Abiotic Stress Responses and Distinct Levels of Nucleotide Diversity
Source: Int J Genomics. 2019 May 2;2019:9520642. doi: 10.1155/2019/9520642 (PMC6525893; doi:10.1155/2019/9520642)
Supplement: Supplementary 1 — Supplementary File S1: BLASTp annotation file of all AP2-containing sequences from common bean. All protein sequences were retrieved from Phytozome. [file 9520642.f1.xlsx]

## Sheet: Plan1
Número	Phytozome number ID	Verificação do domínio Ap2 (Pfam, SMART)	Anotação com BLASTp	E-value	Sequences annotated as DREBs
1	>27139851_peptide|Pvulgaris|Phvul.010G092300|Phvul.010G092300.1	1 AP2	ERF4-like protein soybean	1e-170
2	>27139999_peptide|Pvulgaris|Phvul.010G054000|Phvul.010G054000.1	1 AP2	ERF034-like soybean	2e-124	X
3	>27140094_peptide|Pvulgaris|Phvul.010G159500|Phvul.010G159500.1	1 AP2	ERF003-like soybean	8e-87
4	>27140387_peptide|Pvulgaris|Phvul.010G050500|Phvul.010G050500.1	1 AP2	ERF13-like soybean	6e-89
5	>27140402_peptide|Pvulgaris|Phvul.010G146600|Phvul.010G146600.1	1 AP2	DREB3-like soybean	1e-92	X
6	>27140472_peptide|Pvulgaris|Phvul.010G158700|Phvul.010G158700.1	1 AP2	AP2/ERF domain containing Populus trichocarpa	6e-40
7	>27140567_peptide|Pvulgaris|Phvul.010G050600|Phvul.010G050600.1	1 AP2	ERF2-like soybean	6e-79
8	>27140663_peptide|Pvulgaris|Phvul.010G130200|Phvul.010G130200.1	2 AP2	ERF AIL-like soybean	0
9	>27143902_peptide|Pvulgaris|Phvul.003G223600|Phvul.003G223600.1	1 AP2	ERF025-like soybean	3e-84	X
10	>27143934_peptide|Pvulgaris|Phvul.003G180000|Phvul.003G180000.1	1 AP2	ERF Medicago truncatula	1e-83
11	>27144098_peptide|Pvulgaris|Phvul.003G111800|Phvul.003G111800.1	AP2, B3	TEM1-like soybean	0
12	>27145070_peptide|Pvulgaris|Phvul.003G165000|Phvul.003G165000.1	AP2	WIN1-like soybean	2e-130
13	>27145636_peptide|Pvulgaris|Phvul.009G084400|Phvul.009G084400.1	AP2	DREB3 soybean	1e-38	X
14	>27145650_peptide|Pvulgaris|Phvul.009G206500|Phvul.009G206500.1	2 domínios AP2	AP2-containing soybean	0
15	>27145983_peptide|Pvulgaris|Phvul.009G240800|Phvul.009G240800.1	1 AP2	ERF098-like soybean	2e-64
16	>27146023_peptide|Pvulgaris|Phvul.009G262200|Phvul.009G262200.1	1 AP2	EREBP/AP2 soybean	0
17	>27146145_peptide|Pvulgaris|Phvul.009G225000|Phvul.009G225000.1	1 AP2	ERF017-like soybean	1e-111	X
18	>27146455_peptide|Pvulgaris|Phvul.009G029600|Phvul.009G029600.1	1 AP2	Predicted RAP2.4 soybean	7e-160	X
19	>27146728_peptide|Pvulgaris|Phvul.009G161000|Phvul.009G161000.1	1 AP2	ERF114-like soybean	4e-104
20	>27146872_peptide|Pvulgaris|Phvul.009G109600|Phvul.009G109600.1	1 AP2	DREB3-like soybean	2e-97	X
21	>27147665_peptide|Pvulgaris|Phvul.009G089300|Phvul.009G089300.1	1 AP2	PPLZ02-like soybean	4e-113
22	>27147693_peptide|Pvulgaris|Phvul.009G093600|Phvul.009G093600.1	1 AP2	SHINE 3-like soybean	7e-98
23	>27148341_peptide|Pvulgaris|Phvul.005G180600|Phvul.005G180600.1	1 AP2	ERF003-like soybean	1e-94
24	>27148374_peptide|Pvulgaris|Phvul.005G111200|Phvul.005G111200.1	1 AP2	DREBa- soybean	5e-82	X
25	>27148641_peptide|Pvulgaris|Phvul.005G126300|Phvul.005G126300.1	1 AP2	DREB1F - soybean	2e-98	X
26	>27148643_peptide|Pvulgaris|Phvul.005G170600|Phvul.005G170600.1	1 AP2	DREB3-like soybean	5e-106	X
27	>27148710_peptide|Pvulgaris|Phvul.005G138300|Phvul.005G138300.1	2 AP2	RAP2.7	0
28	>27148846_peptide|Pvulgaris|Phvul.005G126600|Phvul.005G126600.1	1 AP2	DREB1D-like soybean	5e-93	X
29	>27151453_peptide|Pvulgaris|Phvul.011G091400|Phvul.011G091400.1	1 AP2	DREB1F-like soybean	9e-117	X
30	>27151582_peptide|Pvulgaris|Phvul.011G187400|Phvul.011G187400.1	1 AP2	wrinkled-1 soybean	0
31	>27152446_peptide|Pvulgaris|Phvul.011G125200|Phvul.011G125200.1	1 AP2	preditec ERF-9 soybean	2e-77
32	>27152559_peptide|Pvulgaris|Phvul.011G071100|Phvul.011G071100.1	2 AP2	RAP2.7-like soybean	0
33	>27153421_peptide|Pvulgaris|Phvul.008G222400|Phvul.008G222400.1	1 AP2	SGR soybean	1e-91	X
34	>27153515_peptide|Pvulgaris|Phvul.008G172200|Phvul.008G172200.1	1 AP2	RAP.2.4 soybean	2e-135	X
35	>27153667_peptide|Pvulgaris|Phvul.008G246000|Phvul.008G246000.1	1 AP2	PTI6-like soybean	9e-130
36	>27154046_peptide|Pvulgaris|Phvul.008G131500|Phvul.008G131500.1	1 AP2	predited ERF- SOYBEAN	9e-123	Classified at first, but eliminated due to alignment analyses. Does not present Valin at position 14 in AP2 domain.
37	>27154067_peptide|Pvulgaris|Phvul.008G141000|Phvul.008G141000.1	1 AP2	ERF034 soybean	1e-102	X
38	>27154361_peptide|Pvulgaris|Phvul.008G046400|Phvul.008G046400.1	1 AP2	ERF2-like soybean	3e-100
39	>27154384_peptide|Pvulgaris|Phvul.008G214700|Phvul.008G214700.1	1 AP2	ERF3-like soybean	2e-77
40	>27154586_peptide|Pvulgaris|Phvul.008G220400|Phvul.008G220400.1	1 AP2	DREB2A Vigna unguiculata	0	X
41	>27154638_peptide|Pvulgaris|Phvul.008G159400|Phvul.008G159400.1	1 AP2	CRF3-like soybean	3e-136
42	>27154672_peptide|Pvulgaris|Phvul.008G039300|Phvul.008G039300.1	1 AP2	ERF Medicago truncatula	2e-148
43	>27154677_peptide|Pvulgaris|Phvul.008G043500|Phvul.008G043500.1	2 AP2	WRI1-like soybean	0
44	>27154707_peptide|Pvulgaris|Phvul.008G092800|Phvul.008G092800.1	1 AP2	DRE-binding protein soybean	0	X
45	>27154757_peptide|Pvulgaris|Phvul.008G019600|Phvul.008G019600.1	1 AP2	ERF113-like soybean	3e-80
46	>27154802_peptide|Pvulgaris|Phvul.008G052000|Phvul.008G052000.1	2 AP2	AP2 BBM2-like soybean	0
47	>27156495_peptide|Pvulgaris|Phvul.004G069900|Phvul.004G069900.1	1 AP2	ERF RAP2-3 soybean	4e-84
48	>27157916_peptide|Pvulgaris|Phvul.004G092100|Phvul.004G092100.1	1 AP2	AP2 EREBP Lotus japonicus	2e-70
49	>27158179_peptide|Pvulgaris|Phvul.004G169800|Phvul.004G169800.1	1 AP2	AP2 DREB3 soybean	1e-104	X
50	>27158203_peptide|Pvulgaris|Phvul.004G031900|Phvul.004G031900.1	1 AP2	ERF Medicago truncatula	0
51	>27158312_peptide|Pvulgaris|Phvul.004G081200|Phvul.004G081200.1	1 AP2	RAP2.11 Medicago truncatula	8e-82
52	>27158337_peptide|Pvulgaris|Phvul.004G122000|Phvul.004G122000.1	1 AP2	DREB1-like soybean	1e-123	X
53	>27158873_peptide|Pvulgaris|Phvul.007G217800|Phvul.007G217800.1	1 AP2	ERF protein soybean	4e-180
54	>27158875_peptide|Pvulgaris|Phvul.007G102800|Phvul.007G102800.1	AP2, B3	TEM1-like soybean	0
55	>27159144_peptide|Pvulgaris|Phvul.007G241600|Phvul.007G241600.1	1 AP2	ERF5 soybean	3e-120
56	>27159147_peptide|Pvulgaris|Phvul.007G193300|Phvul.007G193300.1	1 AP2	ERF1B-like soybean	2e-110
57	>27159902_peptide|Pvulgaris|Phvul.007G193700|Phvul.007G193700.1	1 AP2	ERF1B-like soybean	9e-112
58	>27160917_peptide|Pvulgaris|Phvul.007G222500|Phvul.007G222500.1	1 AP2	DREB1F-like soybean	4e-93	X
59	>27161023_peptide|Pvulgaris|Phvul.007G272900|Phvul.007G272900.1	1 AP2	ERF098-like soybean	3e-58
60	>27161043_peptide|Pvulgaris|Phvul.007G128100|Phvul.007G128100.1	1 AP2	ERF098-like soybean	2e-61
61	>27161257_peptide|Pvulgaris|Phvul.007G135900|Phvul.007G135900.1	1 AP2	ERF Medicago truncatula	1e-111
62	>27161303_peptide|Pvulgaris|Phvul.007G255100|Phvul.007G255100.1	1 AP2	DREB2F-like soybean	7e-161	X
63	>27161344_peptide|Pvulgaris|Phvul.007G272800|Phvul.007G272800.1	1 AP2	ERF098-like soybean	6e-49
64	>27161577_peptide|Pvulgaris|Phvul.007G240200|Phvul.007G240200.1	1 AP2	RAP2-7	0
65	>27161605_peptide|Pvulgaris|Phvul.007G121200|Phvul.007G121200.1	1 AP2	AP2/ERF domain containing Populus trichocarpa	2e-43
66	>27161618_peptide|Pvulgaris|Phvul.007G193900|Phvul.007G193900.1	1 AP2	ERF098-like soybean	0
67	>27161633_peptide|Pvulgaris|Phvul.007G135300|Phvul.007G135300.1	1 AP2	ERF062-like soybean	0	X
68	>27161692_peptide|Pvulgaris|Phvul.007G127800|Phvul.007G127800.1	1 AP2	ERF1B-like soybean	3e-102
69	>27163081_peptide|Pvulgaris|Phvul.001G111800|Phvul.001G111800.1	1 AP2	RAP2.11-like soybean	3e-156
70	>27163132_peptide|Pvulgaris|Phvul.001G010400|Phvul.001G010400.1	1 AP2	DREB2B-like soybean	2e-68	X
71	>27163272_peptide|Pvulgaris|Phvul.001G099700|Phvul.001G099700.1	1 AP2	LEP-like soybean	7e-83
72	>27163342_peptide|Pvulgaris|Phvul.001G160400|Phvul.001G160400.1	1 AP2	ERF098-like soybean	7e-56
73	>27163394_peptide|Pvulgaris|Phvul.001G131300|Phvul.001G131300.1	superfamília AP2	AP2-like ERF soybean	0
74	>27163426_peptide|Pvulgaris|Phvul.001G137500|Phvul.001G137500.1	2 AP2	PLT2-like soybean	5e-37
75	>27163436_peptide|Pvulgaris|Phvul.001G084000|Phvul.001G084000.1	1 AP2	ERF113-like soybean	2e-84
76	>27163589_peptide|Pvulgaris|Phvul.001G174400|Phvul.001G174400.1	2 AP2	Floral homeotic protein AP2 soybean	0
77	>27164985_peptide|Pvulgaris|Phvul.006G173500|Phvul.006G173500.1	1 AP2	AP2-containing Populus tricocarpa	5e-157
78	>27164987_peptide|Pvulgaris|Phvul.006G183100|Phvul.006G183100.1	1 AP2	ERF4-like soybean	3e-102
79	>27165179_peptide|Pvulgaris|Phvul.006G163100|Phvul.006G163100.1	1 AP2	ERF086-like soybean	2e-110
80	>27165358_peptide|Pvulgaris|Phvul.006G179800|Phvul.006G179800.1	1 AP2	PTI5-like soybean	3e-99	Classified at first, but eliminated due to alignment analyses. Does not present Valin at position 14 in AP2 domain.
81	>27165371_peptide|Pvulgaris|Phvul.006G047800|Phvul.006G047800.1	1 AP2	ERF3-like soybean	9e-98
82	>27165423_peptide|Pvulgaris|Phvul.006G110200|Phvul.006G110200.1	1 AP2	CRF4-like	3e-94
83	>27165755_peptide|Pvulgaris|Phvul.006G179700|Phvul.006G179700.1	1 AP2	ERF091-like soybean	6e-159
84	>27167533_peptide|Pvulgaris|Phvul.002G016900|Phvul.002G016900.1	2 AP2	Floral homeotic protein AP2 soybean	0
85	>27167543_peptide|Pvulgaris|Phvul.002G162500|Phvul.002G162500.1	1 AP2	CRF2-like	6e-131
86	>27167763_peptide|Pvulgaris|Phvul.002G310200|Phvul.002G310200.1	1 AP2	DREB3-like soybean	9e-100	X
87	>27167765_peptide|Pvulgaris|Phvul.002G009100|Phvul.002G009100.1	2 AP2	ANT-like soybean	0
88	>27167865_peptide|Pvulgaris|Phvul.002G237300|Phvul.002G237300.1	1 AP2	ERF015-like soybean	1e-113
89	>27167873_peptide|Pvulgaris|Phvul.002G036000|Phvul.002G036000.1	1 AP2	ERF021-like soybean	7e-83	X
90	>27168340_peptide|Pvulgaris|Phvul.002G281300|Phvul.002G281300.1	1 AP2	ERF114-like soybean	1e-75
91	>27168743_peptide|Pvulgaris|Phvul.002G035100|Phvul.002G035100.1	1 AP2	ERF020-like soybean	7e-68	X
92	>27168780_peptide|Pvulgaris|Phvul.002G055800|Phvul.002G055800.1	1 AP2	ERF5-like soybean	1e-120
93	>27169111_peptide|Pvulgaris|Phvul.002G016700|Phvul.002G016700.1	1 AP2	DREB1-like soybean	3e-77	X
94	>27169406_peptide|Pvulgaris|Phvul.002G056800|Phvul.002G056800.1	1 AP2	DREB3-like soybean	1e-62	X
95	>27169437_peptide|Pvulgaris|Phvul.002G149500|Phvul.002G149500.1	1 AP2	ESR2-like	4e-174
96	>27169862_peptide|Pvulgaris|Phvul.002G154000|Phvul.002G154000.1	1 AP2	ERF025-like soybean	9e-70	X
97	>27169881_peptide|Pvulgaris|Phvul.002G267800|Phvul.002G267800.1	1 AP2	ERF Medicago truncatula	2e-55
98	>27170864_peptide|Pvulgaris|Phvul.002G315900|Phvul.002G315900.1	1 AP2	ERF Medicago truncatula	6e-21
99	>27171224_peptide|Pvulgaris|Phvul.002G153900|Phvul.002G153900.1	1 AP2	DREB1F-like soybean	4e-93	X
100	>27171307_peptide|Pvulgaris|Phvul.002G254500|Phvul.002G254500.1	1 AP2	ERF060-like soybean, DREB em Populus	2e-140	X
101	>27141088_peptide|Pvulgaris|Phvul.010G124700|Phvul.010G124700.1	1 AP2	ERF soybean	0
102	>27141300_peptide|Pvulgaris|Phvul.010G035200|Phvul.010G035200.1	1 AP2	CRF4-like soybean	2e-105
103	>27141335_peptide|Pvulgaris|Phvul.010G050700|Phvul.010G050700.1	1 AP2	ERF2-like soybean	2e-74
104	>27141477_peptide|Pvulgaris|Phvul.010G050800|Phvul.010G050800.1	1 AP2	ERF13-like soybean	1e-62
105	>27141551_peptide|Pvulgaris|Phvul.010G154900|Phvul.010G154900.1	1 AP2	WIN1-like soybean	2e-110
106	>27141696_peptide|Pvulgaris|Phvul.010G114900|Phvul.010G114900.1	1 AP2	ERF023-like soybean	2e-87	X
107	>27141828_peptide|Pvulgaris|Phvul.003G241900|Phvul.003G241900.1	2 AP2	Floral homeotic protein AP2 soybean	0
108	>27141840_peptide|Pvulgaris|Phvul.003G241700|Phvul.003G241700.1	1 AP2	ERF008-like	7e-63	X
109	>27141890_peptide|Pvulgaris|Phvul.003G102500|Phvul.003G102500.1	1 AP2	ERF086-like soybean	0
110	>27141898_peptide|Pvulgaris|Phvul.003G288500|Phvul.003G288500.1	2 AP2	PLT2-like soybean	0
111	>27141901_peptide|Pvulgaris|Phvul.003G035500|Phvul.003G035500.1	1 AP2	ERF118-like soybean	4e-93
112	>27141948_peptide|Pvulgaris|Phvul.003G064800|Phvul.003G064800.1	1 AP2	ESR2-like	4e-88
113	>27142251_peptide|Pvulgaris|Phvul.003G212800|Phvul.003G212800.1	1 AP2	DREB1F-like soybean	3e-130	X
114	>27142284_peptide|Pvulgaris|Phvul.003G153100|Phvul.003G153100.1	2 AP2	AP2-ERF factor soybean	0
115	>27142315_peptide|Pvulgaris|Phvul.003G069000|Phvul.003G069000.1	2 AP2	ANT-like soybean	0
116	>27142827_peptide|Pvulgaris|Phvul.003G292400|Phvul.003G292400.1	1 AP2	ERF109-like soybean	7e-111	Classified at first, but eliminated due to alignment analyses. Does not present Valin at position 14 in AP2 domain.
117	>27142922_peptide|Pvulgaris|Phvul.003G222600|Phvul.003G222600.1	1 AP2	DREB6-like soybean	1e-82	X
118	>27144290_peptide|Pvulgaris|Phvul.003G107900|Phvul.003G107900.1	4 AP2	RAP2-3 like soybean	4e-35
119	>27144429_peptide|Pvulgaris|Phvul.003G232600|Phvul.003G232600.1	2 AP2	ANT-like soybean	0
120	>27144847_peptide|Pvulgaris|Phvul.003G212700|Phvul.003G212700.1	1 AP2	ERF026-like soybean	5e-80	X
121	>27145016_peptide|Pvulgaris|Phvul.003G144500|Phvul.003G144500.1	2 AP2	AIL5-like soybean	0
122	>27145376_peptide|Pvulgaris|Phvul.009G240900|Phvul.009G240900.1	1 AP2	ERF098-like soybean	1e-61
123	>27145410_peptide|Pvulgaris|Phvul.009G013200|Phvul.009G013200.1	1 AP2	DREB2D soybean	4e-115	X
124	>27147205_peptide|Pvulgaris|Phvul.009G196900|Phvul.009G196900.1	1 AP2	WIN1-like soybean	1e-108
125	>27147313_peptide|Pvulgaris|Phvul.009G074300|Phvul.009G074300.1	2 AP2	ANT-like soybean	0
126	>27147884_peptide|Pvulgaris|Phvul.009G251600|Phvul.009G251600.1	1 AP2	RAP2-3 like soybean	6e-95
127	>27148129_peptide|Pvulgaris|Phvul.009G137000|Phvul.009G137000.1	1 AP2	CRF4-like soybean	0
128	>27148196_peptide|Pvulgaris|Phvul.009G137900|Phvul.009G137900.1	1 AP2	ERF109-like soybean	4e-96
129	>27148282_peptide|Pvulgaris|Phvul.009G123300|Phvul.009G123300.1	1 AP2	ERF012-like soybean	3e-101	X
130	>27149285_peptide|Pvulgaris|Phvul.005G128200|Phvul.005G128200.1	Adaptin-N	AP-2 compleX subunit alpha-2-like soybean	0
131	>27149957_peptide|Pvulgaris|Phvul.005G105200|Phvul.005G105200.1	1 AP2	ERF054-like soybean, DREB5 soybean	0	X
132	>27150196_peptide|Pvulgaris|Phvul.005G183700|Phvul.005G183700.1	1 AP2	AP2 domain containing Populus trichocarpa	3e-124
133	>27150498_peptide|Pvulgaris|Phvul.005G074700|Phvul.005G074700.1	1 AP2	ERF4-like soybean	2e-85
134	>27150503_peptide|Pvulgaris|Phvul.L006500|Phvul.L006500.1	1 AP2	SHINE 3-like soybean	5e-94
135	>27150589_peptide|Pvulgaris|Phvul.011G058000|Phvul.011G058000.1	2 AP2	PLT2-like soybean	0
136	>27150715_peptide|Pvulgaris|Phvul.011G118600|Phvul.011G118600.1	1 AP2	ERF054-like soybean, DREB (Malus domestica)	0	X
137	>27150896_peptide|Pvulgaris|Phvul.011G162900|Phvul.011G162900.1	1 AP2	ERF4-like soybean	9e-75
138	>27151093_peptide|Pvulgaris|Phvul.011G107800|Phvul.011G107800.1	1 AP2	DREB2A-like soybean	5e-98	X
139	>27153180_peptide|Pvulgaris|Phvul.008G271100|Phvul.008G271100.1	1 AP2	ERF3-like soybean	7e-74
140	>27154526_peptide|Pvulgaris|Phvul.008G253600|Phvul.008G253600.1	1 AP2	AP2 ERF soybean	5e-175
141	>27155109_peptide|Pvulgaris|Phvul.008G185400|Phvul.008G185400.1	2 AP2	Floral homeotic protein AP2 soybean	9e-119
142	>27155503_peptide|Pvulgaris|Phvul.008G098900|Phvul.008G098900.1	1 AP2	DREB2 soybean	4e-87	X
143	>27155541_peptide|Pvulgaris|Phvul.008G165000|Phvul.008G165000.1	1 AP2	ERF012-like soybean	1e-98	X
144	>27155743_peptide|Pvulgaris|Phvul.008G046500|Phvul.008G046500.1	1 AP2	ERF2-like soybean	3e-66
145	>27156691_peptide|Pvulgaris|Phvul.004G157600|Phvul.004G157600.1	1 AP2	CRF4-like soybean	1e-39
146	>27156872_peptide|Pvulgaris|Phvul.004G068900|Phvul.004G068900.1	1 AP2	LEP-like soybean	5e-147
147	>27158528_peptide|Pvulgaris|Phvul.007G193800|Phvul.007G193800.1	1 AP2	ERF1B-like soybean	5e-104
148	>27158933_peptide|Pvulgaris|Phvul.007G273000|Phvul.007G273000.1	1 AP2	ERF1B-like soybean	1e-80
149	>27158958_peptide|Pvulgaris|Phvul.007G222600|Phvul.007G222600.1	1 AP2	ERF024-like soybean	4e-96	X
150	>27158967_peptide|Pvulgaris|Phvul.007G128000|Phvul.007G128000.1	1 AP2	ERF098-like soybean	3e-78
151	>27158998_peptide|Pvulgaris|Phvul.007G241800|Phvul.007G241800.1	1 AP2	ERF8 Medicago sativa	2e-118
152	>27159242_peptide|Pvulgaris|Phvul.007G002900|Phvul.007G002900.1	AP2, B3	AP2/ERF domain containing Medicago truncatula	3e-116
153	>27159257_peptide|Pvulgaris|Phvul.007G082000|Phvul.007G082000.1	1 AP2	RAP2.6 - like soybean	3e-64
154	>27159550_peptide|Pvulgaris|Phvul.007G066500|Phvul.007G066500.1	1 AP2	DREB7-like soybean	2e-98	X
155	>27159768_peptide|Pvulgaris|Phvul.007G193400|Phvul.007G193400.1	1 AP2	ERF098-like soybean	4e-45
156	>27159823_peptide|Pvulgaris|Phvul.007G086600|Phvul.007G086600.1	1 AP2	ERF098-like soybean	8e-71
157	>27160137_peptide|Pvulgaris|Phvul.007G027000|Phvul.007G027000.1	1 AP2	ERF118-like soybean	5e-165
158	>27161753_peptide|Pvulgaris|Phvul.001G160300|Phvul.001G160300.1	1 AP2	ERF1B-like soybean	8e-71
159	>27161772_peptide|Pvulgaris|Phvul.001G136100|Phvul.001G136100.1	1 AP2	DREB2F-like soybean	1e-175	X
160	>27161830_peptide|Pvulgaris|Phvul.001G160500|Phvul.001G160500.1	1 AP2	ERF15-like soybean	2e-101
161	>27161994_peptide|Pvulgaris|Phvul.001G073800|Phvul.001G073800.1	1 AP2	TINY soybean	4e-100	X
162	>27162014_peptide|Pvulgaris|Phvul.001G046900|Phvul.001G046900.1	1 AP2	ERF003-like soybean	2e-114
163	>27162066_peptide|Pvulgaris|Phvul.001G160200|Phvul.001G160200.1	1 AP2	ERF1B-like soybean	3e-100
164	>27162264_peptide|Pvulgaris|Phvul.001G251200|Phvul.001G251200.1	1 AP2	ERF060-like soybean, DREB em Trifolium repens	3e-137	X
165	>27162307_peptide|Pvulgaris|Phvul.001G023700|Phvul.001G023700.1	1 AP2	DREB protein soybean	9e-88	X
166	>27162450_peptide|Pvulgaris|Phvul.001G160100|Phvul.001G160100.1	1 AP2	ERF098-like soybean	6e-54
167	>27163882_peptide|Pvulgaris|Phvul.001G044500|Phvul.001G044500.1	1 AP2	RAP2.9-like soybean	4e-49	X
168	>27164373_peptide|Pvulgaris|Phvul.001G157600|Phvul.001G157600.1	1 AP2	ERF8-like soybean	1e-63
169	>27164554_peptide|Pvulgaris|Phvul.001G137600|Phvul.001G137600.1	1 AP2	PLT2 Arabidopsis thaliana	5e-21
170	>27164587_peptide|Pvulgaris|Phvul.001G187100|Phvul.001G187100.1	1 AP2	ERF024-like soybean	2e-112	X
171	>27164843_peptide|Pvulgaris|Phvul.001G031200|Phvul.001G031200.1	2 AP2	ANT-like soybean	0
172	>27165905_peptide|Pvulgaris|Phvul.006G080000|Phvul.006G080000.1	1 AP2	PTI6-like soybean	7e-93
173	>27165944_peptide|Pvulgaris|Phvul.006G114100|Phvul.006G114100.1	1 AP2	ERF023-like soybean	2e-96	X
174	>27166262_peptide|Pvulgaris|Phvul.006G183200|Phvul.006G183200.1	1 AP2	ERF12-like soybean	2e-90
175	>27166613_peptide|Pvulgaris|Phvul.006G106100|Phvul.006G106100.1	1 AP2	ERF1B-like soybean	5e-71
176	>27168112_peptide|Pvulgaris|Phvul.002G035900|Phvul.002G035900.1	1 AP2	ERF021-like soybean	3e-111	X
177	>27168293_peptide|Pvulgaris|Phvul.002G295700|Phvul.002G295700.1	1 AP2	CRF2-like	2e-121
178	>27169651_peptide|Pvulgaris|Phvul.002G055700|Phvul.002G055700.1	1 AP2	ERF1A-LIKE	3e-141
179	>27170036_peptide|Pvulgaris|Phvul.002G168900|Phvul.002G168900.1	1 AP2	AP2/ERF Populus trichocarpa	2e-59
180	>27170330_peptide|Pvulgaris|Phvul.002G146400|Phvul.002G146400.1	2 AP2	AIL6-like soybean	0
181	>27170535_peptide|Pvulgaris|Phvul.002G163700|Phvul.002G163700.1	1 AP2	ERF061-like soybean	3e-145	X
