# Supplementary material for: DREB Genes from Common Bean (Phaseolus vulgaris L.) Show Broad to Specific Abiotic Stress Responses and Distinct Levels of Nucleotide Diversity
Source: Int J Genomics. 2019 May 2;2019:9520642. doi: 10.1155/2019/9520642 (PMC6525893; doi:10.1155/2019/9520642)
Supplement: Supplementary 4 — Supplementary File S4: primers designed for PvDREB cloning and RT-qPCR analyses. [file 9520642.f4.xlsx]

## Sheet: Plan1
Gene	Phytozome accession	Cloning primers (5' - 3')	Expected size (bp) of the gene	RT-qPCR primers (5'- 3')	Expected size (bp) of fragments
PvDREB1	Phvulv091025959m.g	F: ATGAGCACAAAATCAGTTGTAG	882	F: TGCGTCGAGCAATTAGAGAA	153
		R: TCAGATGGAGAAGCTCCA		R: TCCTGATGCGTCTGGTATTG
PvDREB2A	Phvulv091010045m.g	F: ATGTTAGTGAAAAACCACAACA	600	F: TTGGGTACTTTTCCCACTGC	229
		R: TCAAGACAATGAAAGATGGG		R: GCCTTCCATGTCATCATCCT
PvDREB5	Phvulv091010162m.g	F: ATGGAAGGAGAAGGTTTAGGAG	483*	F: GATGAGGAAGTGGGGGAAGT	177
		R: CTAGTCTTCGGGTTTAGGA		R: TCGTCTTGGGAGAGCAGTTC
PvDREB6B	Phvulv091016691m.g	F: ATGGGAACCGCTATAGATATGT	957	F: AATTCTGCATCTCCCTCACG	167
		R: TCATATAGCCGCCCAATC		R: GCTGGGCTTGATTTAGACGA
* Mesoamerican and Andean lines have different sizes. The Andean genotypes usually have 474 bp (from sequenced data, not showed).
