# Supplementary material for: DREB Genes from Common Bean (Phaseolus vulgaris L.) Show Broad to Specific Abiotic Stress Responses and Distinct Levels of Nucleotide Diversity
Source: Int J Genomics. 2019 May 2;2019:9520642. doi: 10.1155/2019/9520642 (PMC6525893; doi:10.1155/2019/9520642)
Supplement: Supplementary 7 — Supplementary File S7: chromosomal distance (bp) among all the putative DREB genes, indicating possible duplication events. From the strict concept adopted in this study, six potential recent duplication events were described, but other genes are nearby each other, which could be an indication of previous duplication with chromosomal rearrangements and new variation among genes. [file 9520642.f7.xlsx]

## Sheet: Plan1
DREB genes location
Chromosome	Phytozome ID	Initial position (bp)	Distance from the previous gene (Mb)	Possibly recent tandem duplications
Chr01	Phvul.001G010400	931454
Chr01	Phvul.001G023700	2101326	1.16987
Chr01	Phvul.001G044500	4680371	2.57904
Chr01	Phvul.001G073800	10050549	5.37018
Chr01	Phvul.001G136100	38195399	28.1449
Chr01	Phvul.001G187100	45289609	7.09421
Chr01	Phvul.001G251200	50886895	5.59729
Chr02	Phvul.002G016700	1837177
Chr02	Phvul.002G035100	3499002	1.66183
Chr02	Phvul.002G035900	3545434	0.046432	X
Chr02	Phvul.002G036000	3561530	0.016096	X
Chr02	Phvul.002G056800	5810982	2.24945
Chr02	Phvul.002G153900	29528341	23.7174	X
Chr02	Phvul.002G154000	29572213	0.043872	X
Chr02	Phvul.002G163700	30545248	0.973035
Chr02	Phvul.002G254500 (PvDREB6B)	42080727	11.5355
Chr02	Phvul.002G310200	47177131	5.0964
Chr03	Phvul.003G212700	42784293		X
Chr03	Phvul.003G212800 (PvDREB1)	42804542	0.020249	X
Chr03	Phvul.003G222600	44044998	1.24046	X
Chr03	Phvul.003G223600	44193652	0.148654	X
Chr03	Phvul.003G241700	46504117	2.31047
Chr04	Phvul.004G122000	39326716
Chr04	Phvul.004G169800	45126736	5.80002
Chr05	Phvul.005G105200	31203406
Chr05	Phvul.005G111200	32566424	1.36302
Chr05	Phvul.005G126300	35040940	2.47452	X
Chr05	Phvul.005G126600	35099239	0.058299	X
Chr05	Phvul.005G170600	39420680	4.32144
Chr06	Phvul.006G114100	22942518
Chr07	Phvul.007G066500	5928454
Chr07	Phvul.007G135300	33385083	27.4566
Chr07	Phvul.007G222500	46214380	12.8293	X
Chr07	Phvul.007G222600	46221519	0.007139	X
Chr07	Phvul.007G255100	49321858	3.10034
Chr08	Phvul.008G092800	9500856
Chr08	Phvul.008G098900 (PvDREB5A)	10466381	0.965525
Chr08	Phvul.008G141000	23916631	13.4503
Chr08	Phvul.008G165000	42621369	18.7047
Chr08	Phvul.008G172200	45116054	2.49469
Chr08	Phvul.008G220400	53286141	8.17009
Chr08	Phvul.008G222400	53485082	0.198941
Chr09	Phvul.009G013200	2059353
Chr09	Phvul.009G029600	6536069	4.47672
Chr09	Phvul.009G084400	13327339	6.79127
Chr09	Phvul.009G109600	16431520	3.10418
Chr09	Phvul.009G123300	18302891	1.87137
Chr09	Phvul.009G225000	33327983	15.0251
Chr10	Phvul.010G054000	8503366
Chr10	Phvul.010G114900	38090570	29.5872
Chr10	Phvul.010G146600	41789538	3.69897
Chr11	Phvul.011G091400	9148323
Chr11	Phvul.011G107800 (PvDREB2A)	12892620	3.7443
Chr11	Phvul.011G118600	19321983	6.42936
